# Supplementary material for: Hexagonal CeO2 nanostructures: an efficient electrode material for supercapacitors
Source: Royal Society of Chemistry journal article supplement (doi:10.1039/c6dt03032g), 2016-01-01
Supplement: c6dt03032g1.pdf [file c6dt03032g1.pdf]

## Electronic Supplementary Information (ESI)

# Hexagonal CeO<sub>2</sub> Nanostructures: An Efficient Electrode Material for Supercapacitors

*Nallappan Maheswari and Gopalan Muralidharan\**

\*Department of Physics, Gandhigram Rural Institute- deemed University, Gandhigram, Tamilnadu, India.

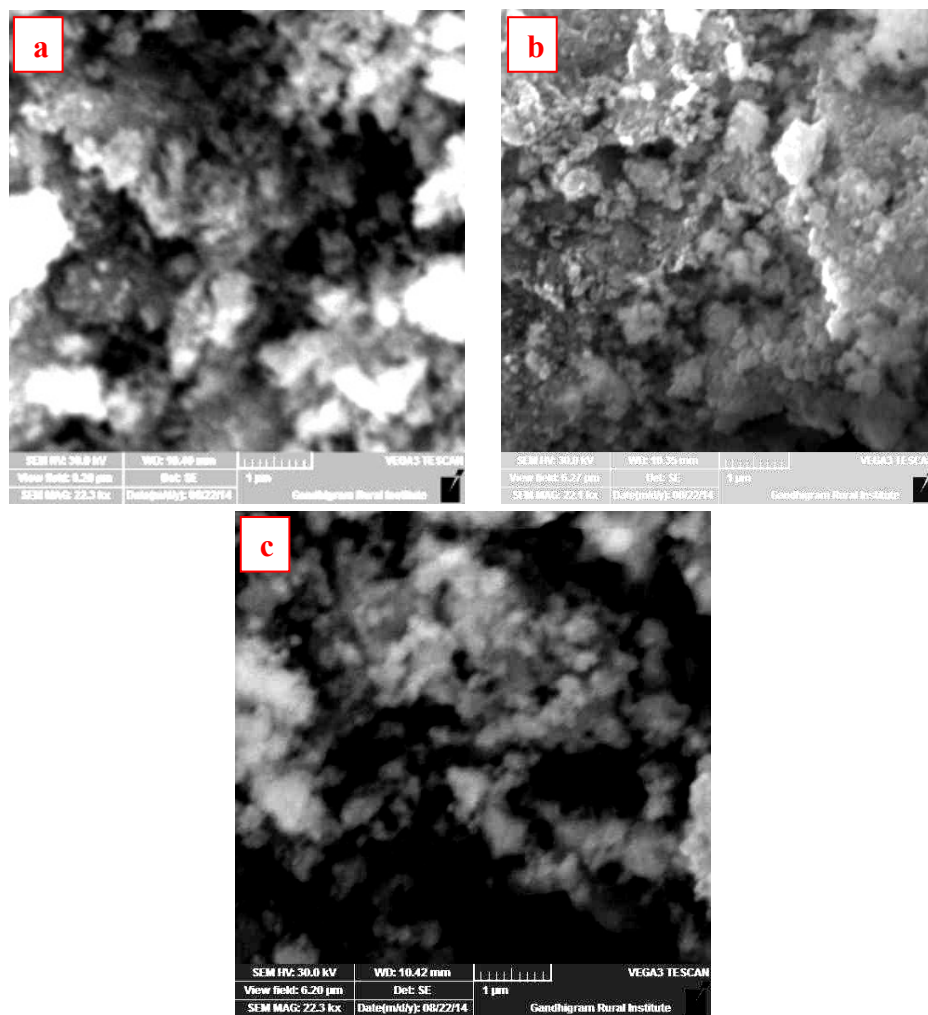

**Fig. S1** SEM images of CeO<sub>2</sub> nanoparticles (a) as prepared, (b) C-400 and (c) C-600

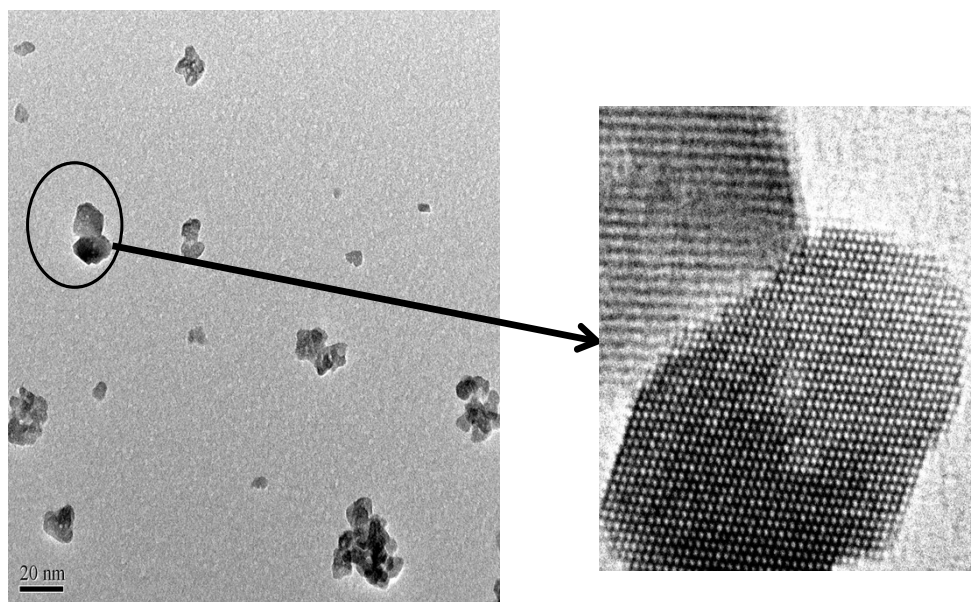

**Fig. S 1A** TEM images of C-500

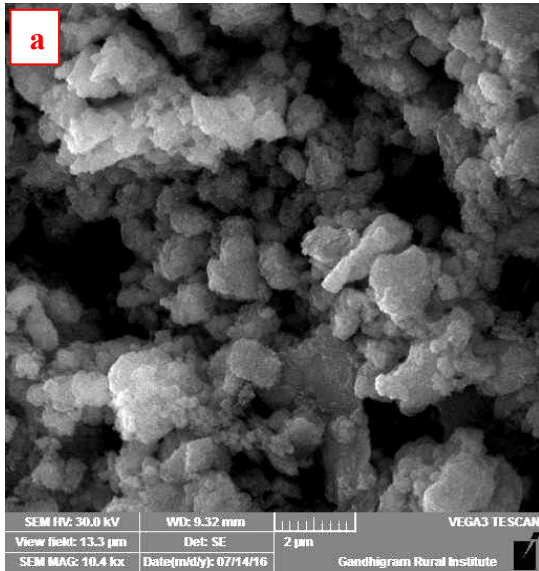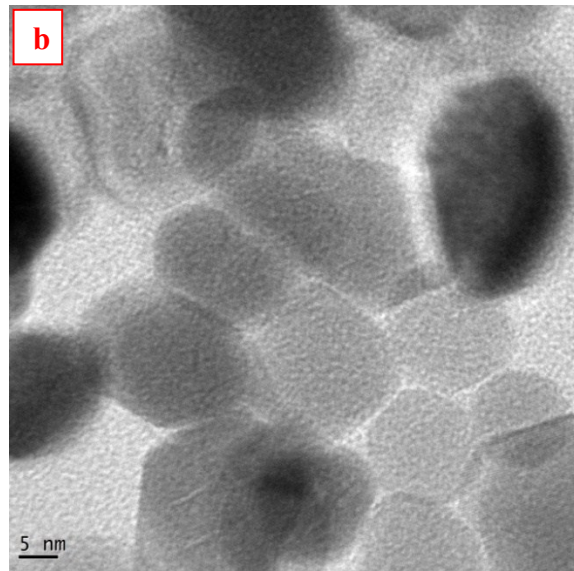

**Fig. S 1B (a) SEM and (b)TEM images of C-500 after cycling test**

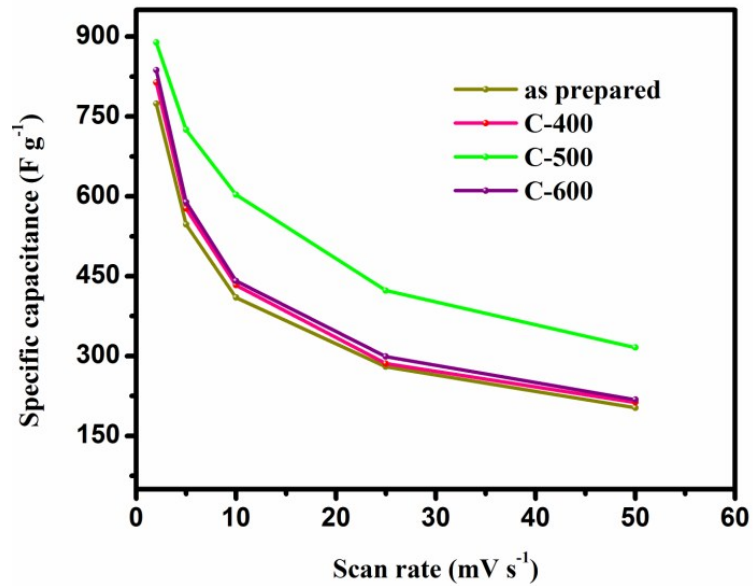

Fig. S2 Specific capacitance as a function of scan rates

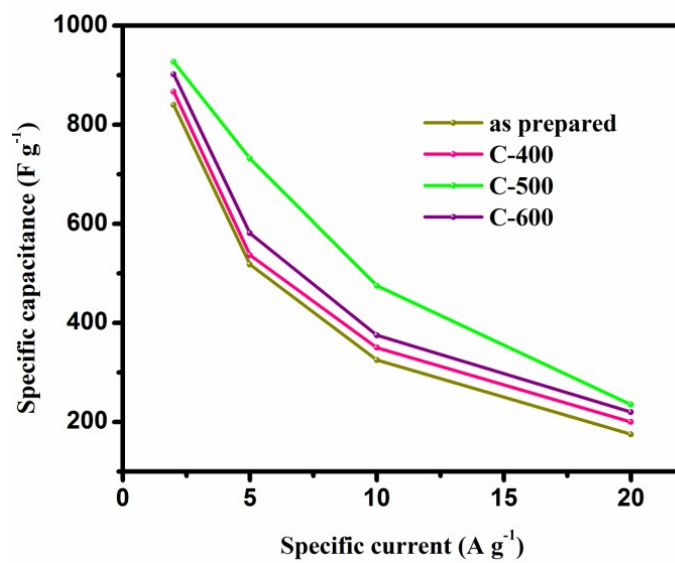

Fig. S3 Variation of specific capacitance as a function of current

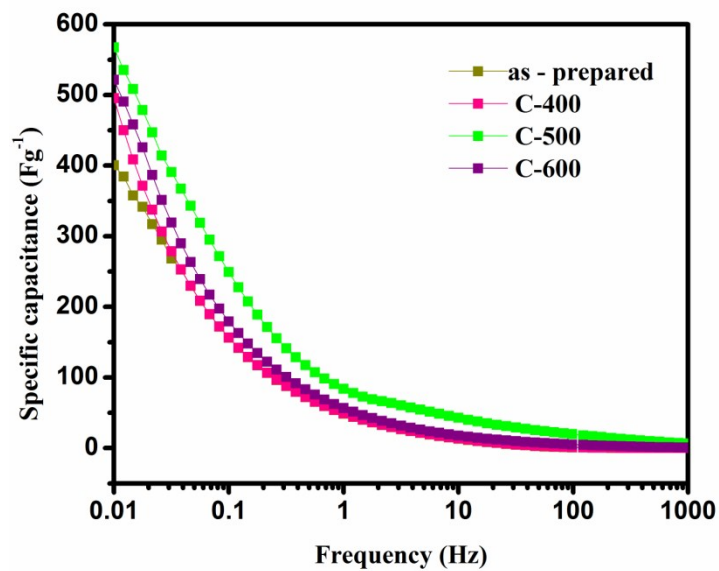

**Fig. S4** Frequency dependent specific capacitance of CeO<sub>2</sub> electrodes

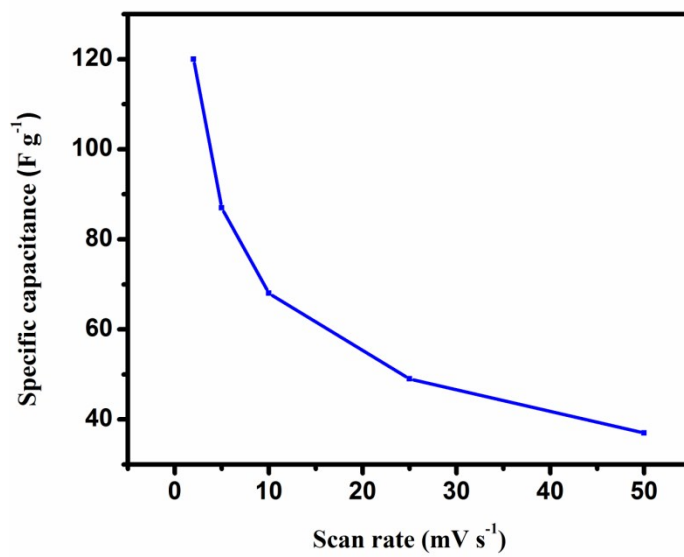

**Fig. S5** Variation of specific capacitance as a function of scan rates

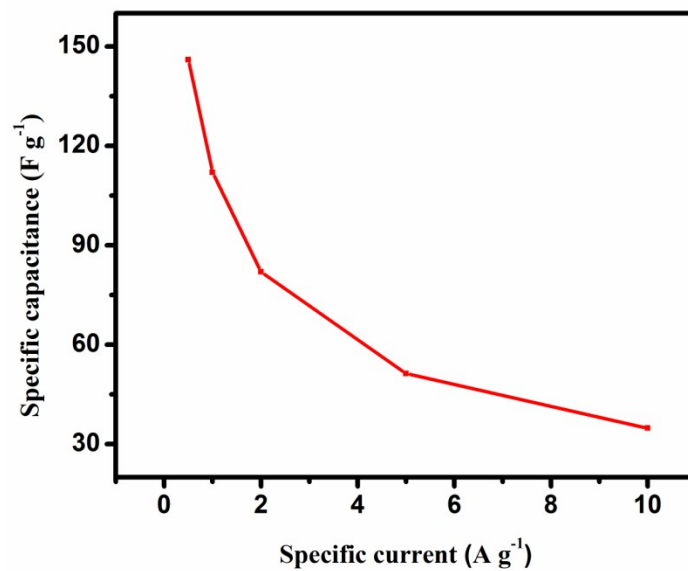

**Fig. S6** Variation of specific capacitance as a function of current densities
